# Supplementary material for: Macrophages, Nitric Oxide and microRNAs Are Associated with DNA Damage Response Pathway and Senescence in Inflammatory Bowel Disease
Source: PLoS One. 2012 Sep 6;7(9):e44156. doi: 10.1371/journal.pone.0044156 (PMC3435404; doi:10.1371/journal.pone.0044156)
Supplement: Table S1 — Characteristics of the study populations. 1CHTN, Cooperative Human Tissue Network. (XLS) [file pone.0044156.s010.xls]

## Sheet: Sheet1
Table S1. Characteristics of the study populations
	Crohn's Disease (n=22)	Ulcerative Colitis (n=21)
Source of tissue	CHTN1	CHTN1
Age-years
Mean (SD)	37.4 (14.2)	35.9 (14.1)
Range	10–68	17–58
Gender-no. (%)
Male	10 (45.5)	11 (52.3)
Female	11 (50.0)	9 (42.9)
unknown	1 (4.5)	1 (4.8)
Race-no. (%)
Caucasian	15 (68.2)	9 (42.9)
African American	0 (0.0)	1(4.8)
unknown	7 (31.8)	11 (52.3)
1CHTN, Cooperative Human Tissue Network
