# Supplementary material for: Macrophages, Nitric Oxide and microRNAs Are Associated with DNA Damage Response Pathway and Senescence in Inflammatory Bowel Disease
Source: PLoS One. 2012 Sep 6;7(9):e44156. doi: 10.1371/journal.pone.0044156 (PMC3435404; doi:10.1371/journal.pone.0044156)
Supplement: Table S2 — MicroRNAs are associated with NOS2 and CD68 expression in Ulcerative Colitis (UC) and Crohn's Disease (CD) tissues. NOS2 and CD68 expression levels were dichotomized based on median expression levels. Class comparison analyses identified microRNAs that were differentially expressed when comparing high vs low expressing groups for NOS2 and CD68. FDR, False discovery rate. (XLS) [file pone.0044156.s011.xls]

## Sheet: Sheet1
Table S2. MicroRNAs are associated with NOS2 and CD68 expression in Ulcerative Colitis (UC) and Crohn's Disease (CD) tissues.
MicroRNAs that are associated with NOS2 expression in UC and CD tissues.
	p-value	FDR	Fold-increase in High NOS2	Probe ID from microarray	mature miRNA detected by probe
1	4.3e-06	0.000903	1.52	hsa-mir-146-prec	hsa-mir-146
2	3.04e-05	0.00319	1.53	hsa-mir-21no1	hsa-mir-21
3	0.0002703	0.0189	1.39	hsa-mir-017-precno2	hsa-mir-17
4	0.0005632	0.0296	1.38	hsa-mir-123-precno1	hsa-mir-123
5	0.0007672	0.0322	1.7	hsa-mir-223-prec	hsa-mir-223
6	0.0014023	0.0491	1.33	hsa-mir-221-prec	hsa-mir-221
MicroRNAs that are associated with CD68 expression in UC and CD tissues.
	p-value	FDR	Fold-increase in High CD68	Probe ID from microarray	mature miRNA detected by probe
1	0.0108434	0.991	0.87	hsa-mir-193-precno2	hsa-mir-193
2	0.015225	0.991	1.29	hsa-mir-21no1	hsa-mir-21
3	0.0227724	0.991	1.18	hsa-mir-213-precno1	hsa-mir-181b
4	0.0233419	0.991	0.92	hsa-mir-196-2-precno2	hsa-mir-196
5	0.0338146	0.991	0.93	hsa-mir-187-precno1	hsa-mir-187
6	0.0365638	0.991	1.12	hsa-mir-181b-2no1	hsa-mir-181b
NOS2 and CD68 expression levels were dichotomized based on median expression levels. Class comparison analyses identified microRNAs that were differentially expressed when comparing high vs low expressing groups for NOS2 and CD68. FDR, False discovery rate.
